# Supplementary material
Source: publisher figshare collection journal article supplement (https://aacr.figshare.com/articles/dataset/_/23553150)
Supplement: Supplementary file 1 [file 41323659]

## Supplementary Table S2

| <u>Sample ID</u> | <u>Parental Cell Line</u> | <u>Cell Growth</u> | <u>Chemotherapy</u> | <u>Arm</u> | <u>Notes</u>                 |
|------------------|---------------------------|--------------------|---------------------|------------|------------------------------|
| HW_H209          | NCI-H209                  | Cell Line          | -                   | 1,2,3      | -                            |
| HW_L1419         | NCI-H209                  | Xenograft          | -                   | 1          | -                            |
| HW_L1420         | NCI-H209                  | Xenograft          | -                   | 3          | -                            |
| HW_R1419         | NCI-H209                  | Xenograft          | -                   | 2          | -                            |
| HW_R1420         | NCI-H209                  | Xenograft          | -                   | -          | No 2 <sup>o</sup> transplant |
| HW_T1620         | NCI-H209                  | Xenograft          | cis/etop            | 1          | -                            |
| HW_T1623         | NCI-H209                  | Xenograft          | cis/etop            | 2          | -                            |
| HW_T1624         | NCI-H209                  | Xenograft          | cis/etop            | 3          | -                            |
| HW_H82           | NCI-H82                   | Cell Line          | -                   | 1,2,3,4    | -                            |
| HW_L1422         | NCI-H82                   | Xenograft          | -                   | 1          | -                            |
| HW_L1424         | NCI-H82                   | Xenograft          | -                   | 3          | -                            |
| HW_R1422         | NCI-H82                   | Xenograft          | -                   | 2          | -                            |
| HW_R1424         | NCI-H82                   | Xenograft          | -                   | 4          | -                            |
| HW_T1426         | NCI-H82                   | Xenograft          | cis/etop            | 2          | -                            |
| HW_T1429         | NCI-H82                   | Xenograft          | cis/etop            | 1          | -                            |
| HW_T1430         | NCI-H82                   | Xenograft          | cis/etop            | 3          | -                            |
| HW_TL1421        | NCI-H82                   | Xenograft          | cis/etop            | 4          | Left Xenograft               |
| HW_TR1421        | NCI-H82                   | Xenograft          | cis/etop            | 4          | Right Xenograft              |
